# Supplementary material for: Synthesis and applications of 2,4-disubstituted thiazole derivatives as small molecule modulators of cellular development
Source: Royal Society of Chemistry journal article supplement (doi:10.1039/c3ob00005b), 2013-01-01

## Supplementary Information

### Synthesis and applications of 2,4-disubstituted thiazole derivatives as small molecule modulators of cellular development

Garr-Layy Zhou,<sup>a</sup> Daniel M. Tams,<sup>b</sup> Todd B. Marder,<sup>a,c</sup> Roy Valentine,<sup>d</sup> Andrew Whiting,<sup>a</sup>  
and Stefan A. Przyborski<sup>b,e</sup>

<sup>a</sup> Department of Chemistry, Durham University, Science Laboratories, South Road, Durham, DH1 3LE, UK

<sup>b</sup> Institut für Anorganische Chemie, Julius-Maximilians-Universität Würzburg, Am Hubland, 97074 Würzburg, Germany

<sup>c</sup> Department of Biological Sciences, Durham University, Science Laboratories, South Road, Durham, DH1 3LE, UK

<sup>d</sup> High Force Research Limited, Bowburn North Industrial Estate, Bowburn, Durham, DH6 5PF, UK

<sup>e</sup>Reinnervate Ltd, NETPark Incubator, Thomas Wright Way, Sedgefield, Co Durham TS21 3FD, UK

#### Table of contents

<sup>1</sup>H and <sup>13</sup>C NMR spectra for new compounds, with a <sup>19</sup>F NMR spectrum for compound 7.

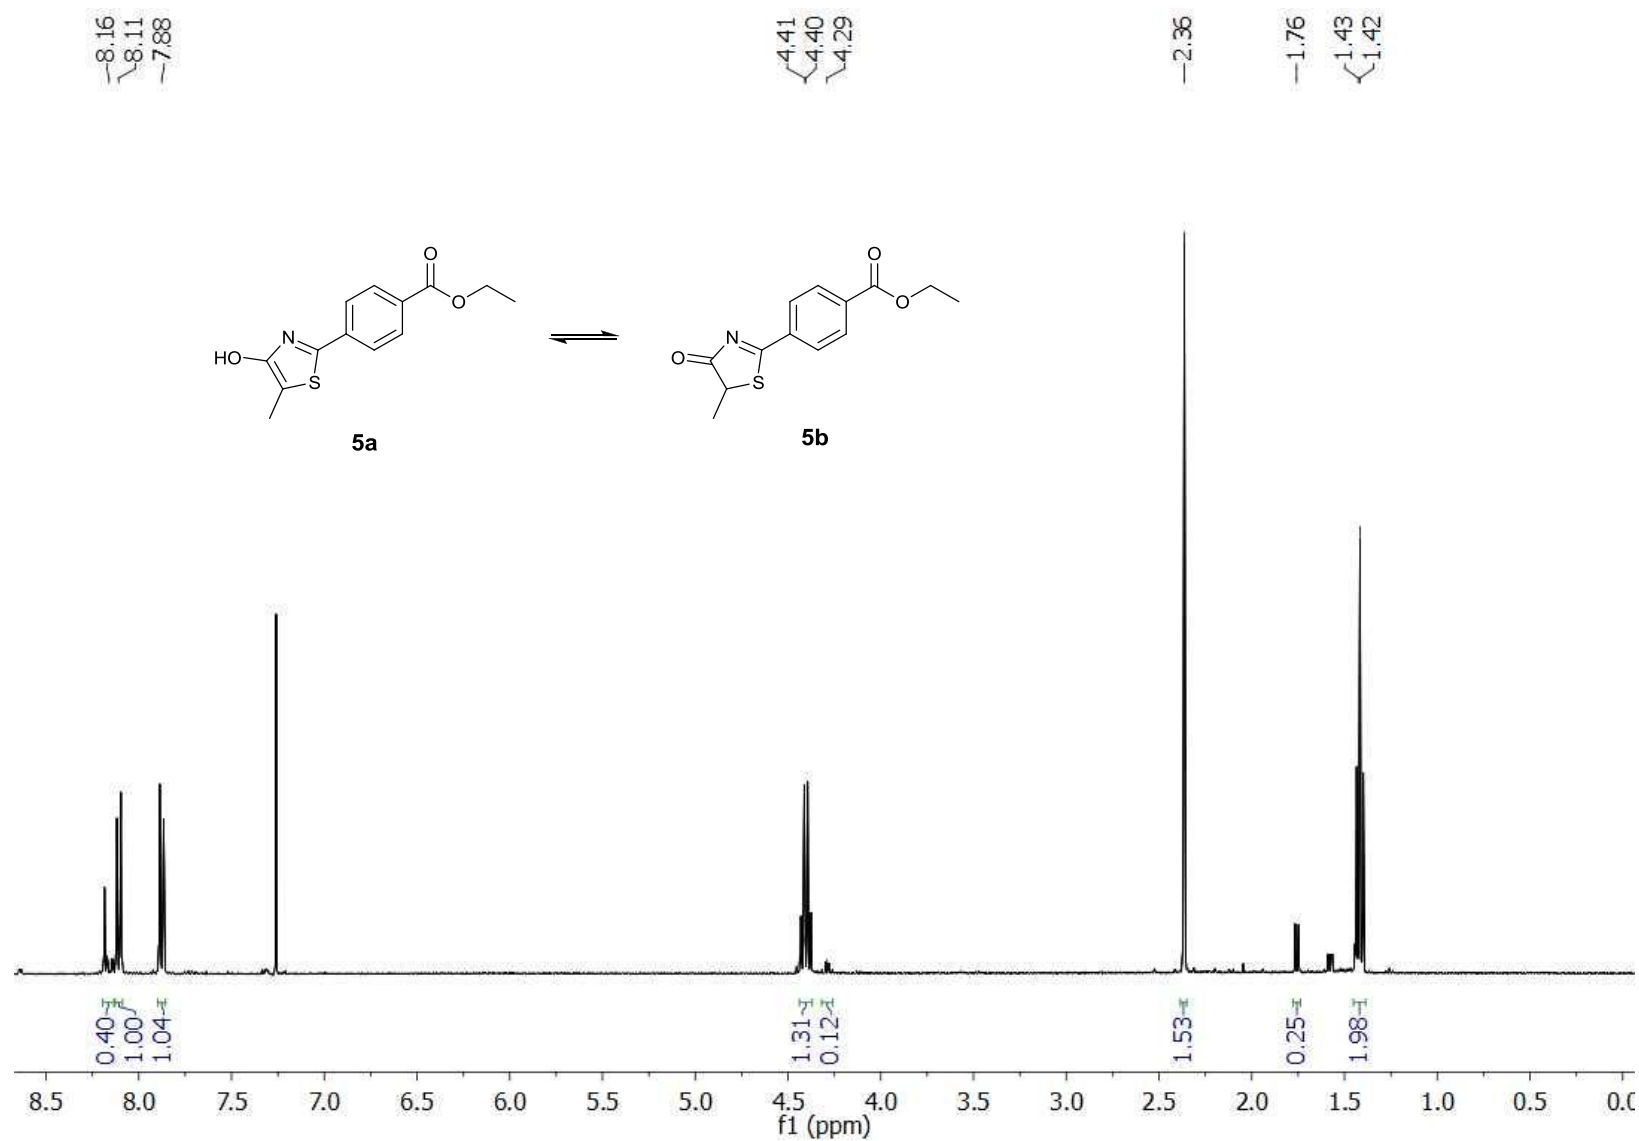

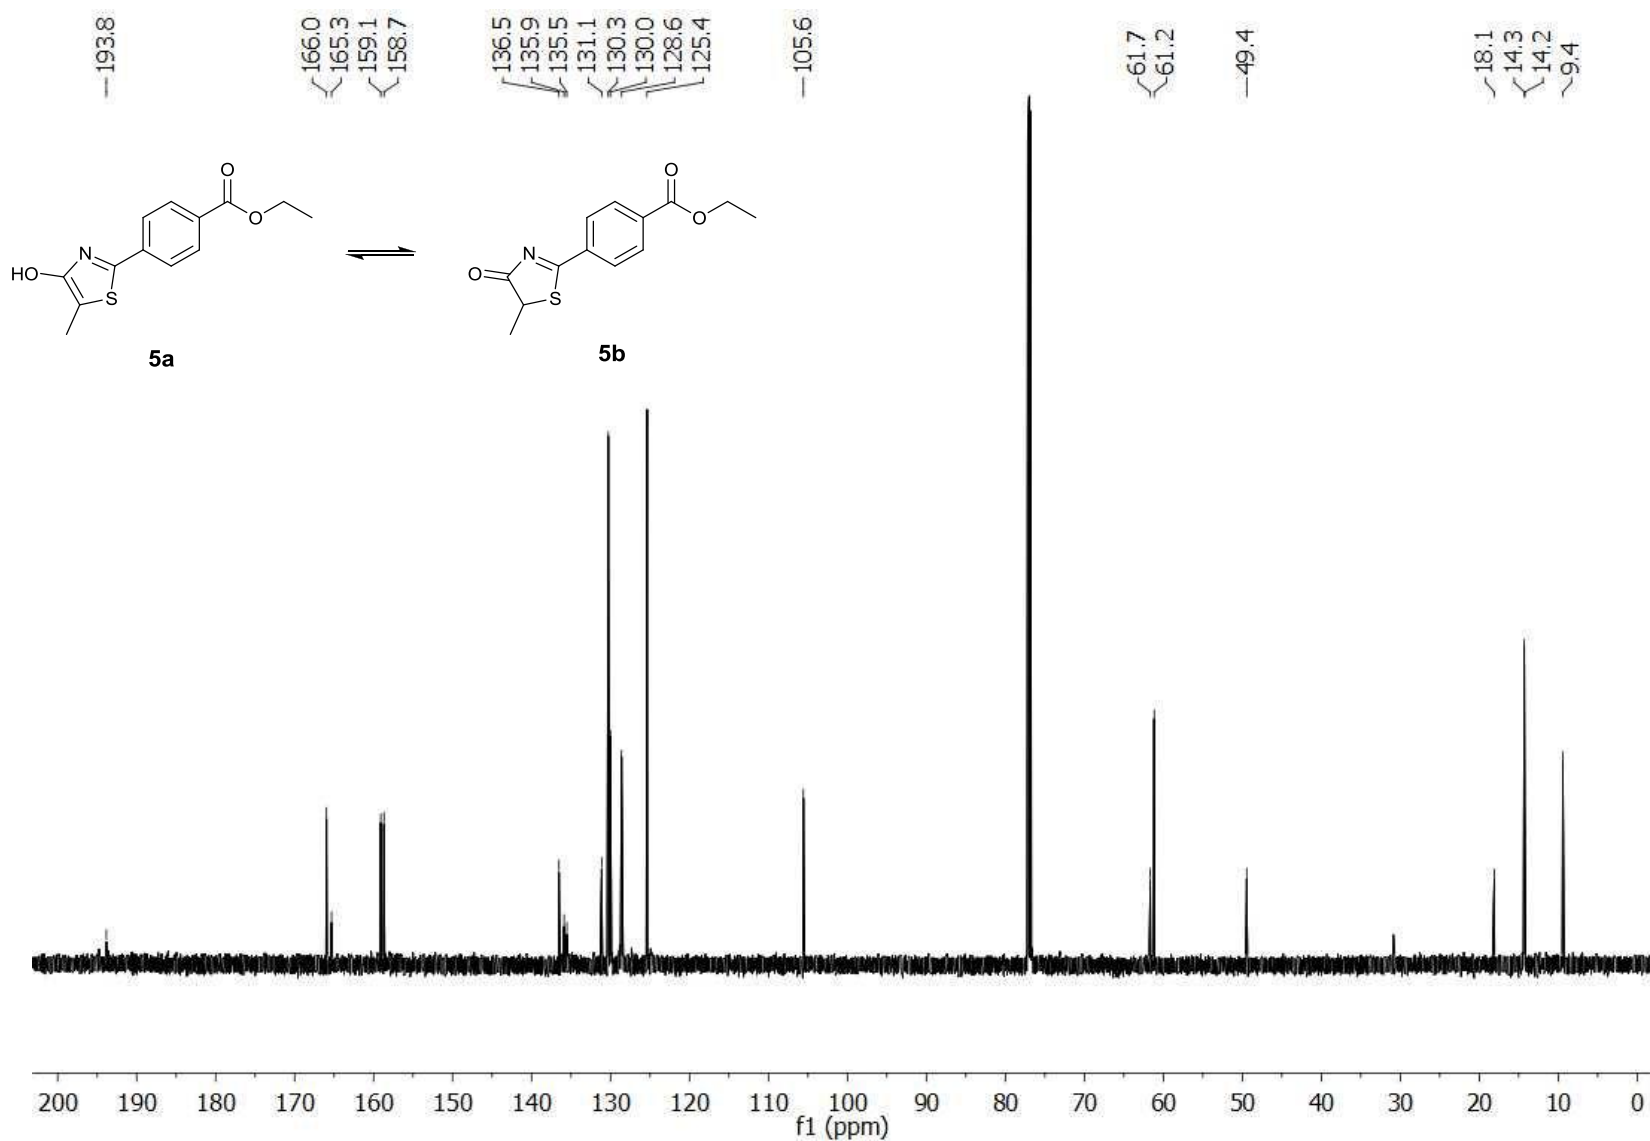

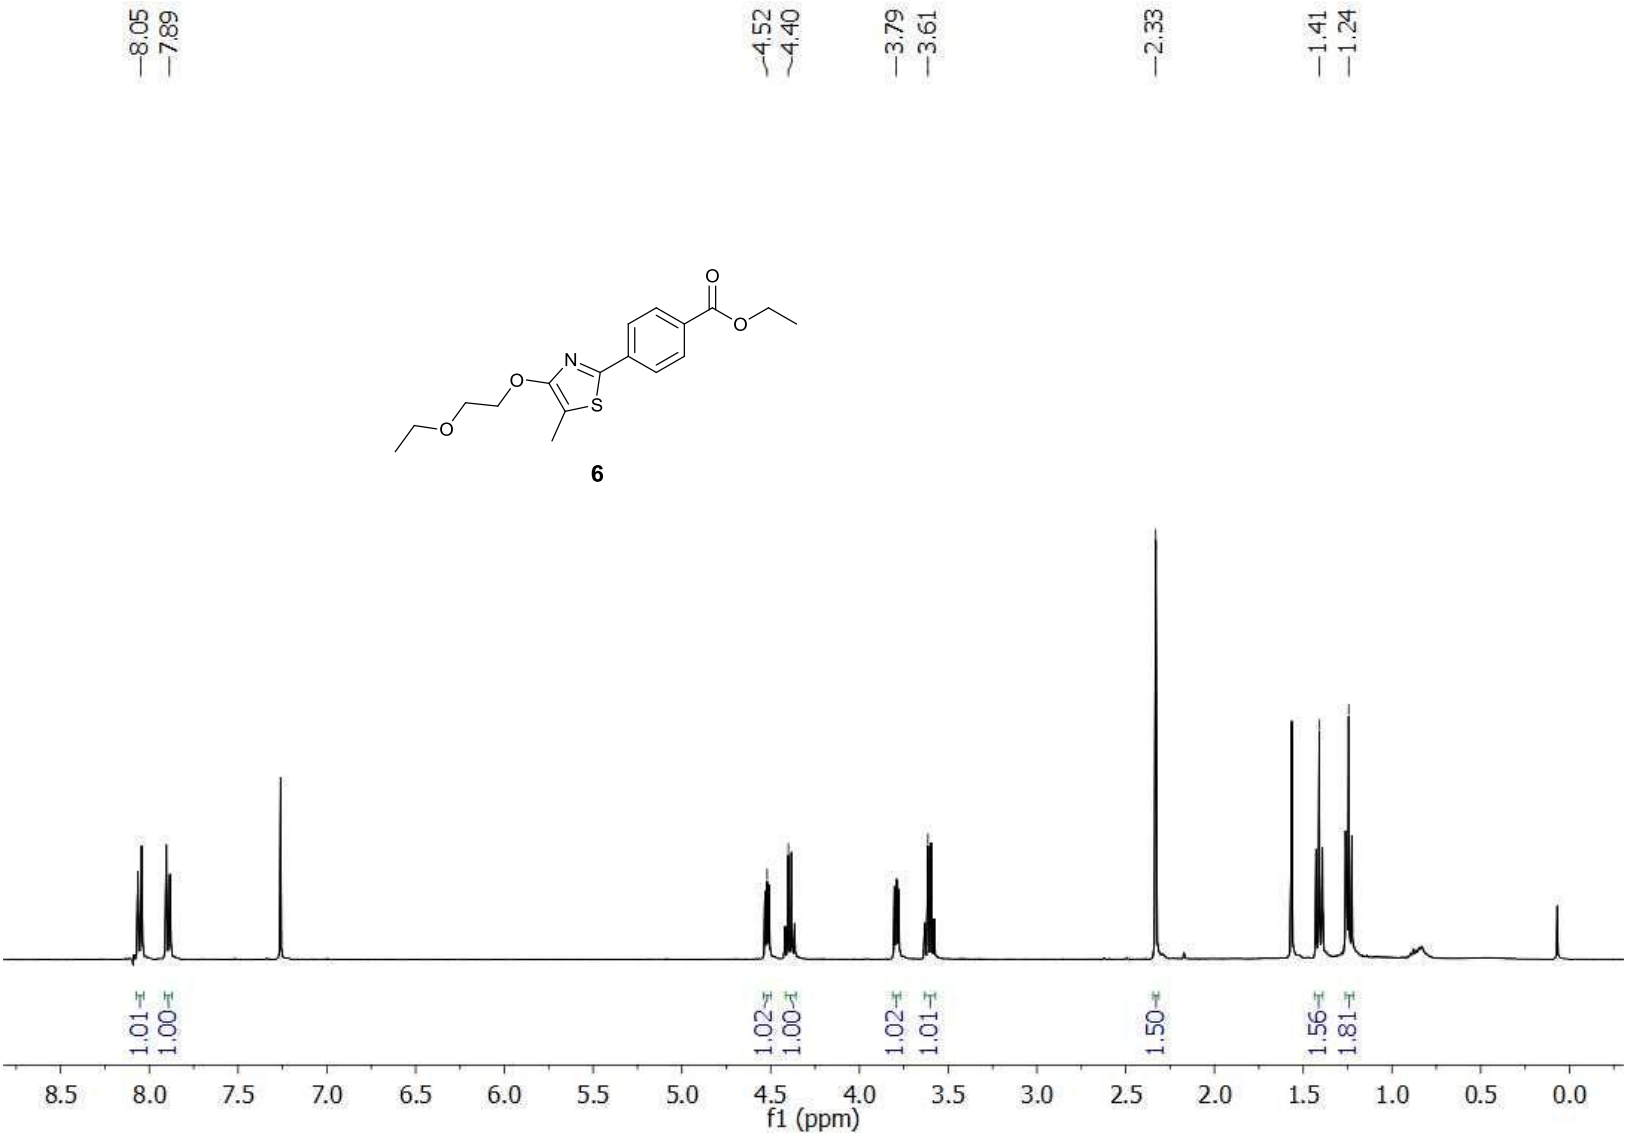

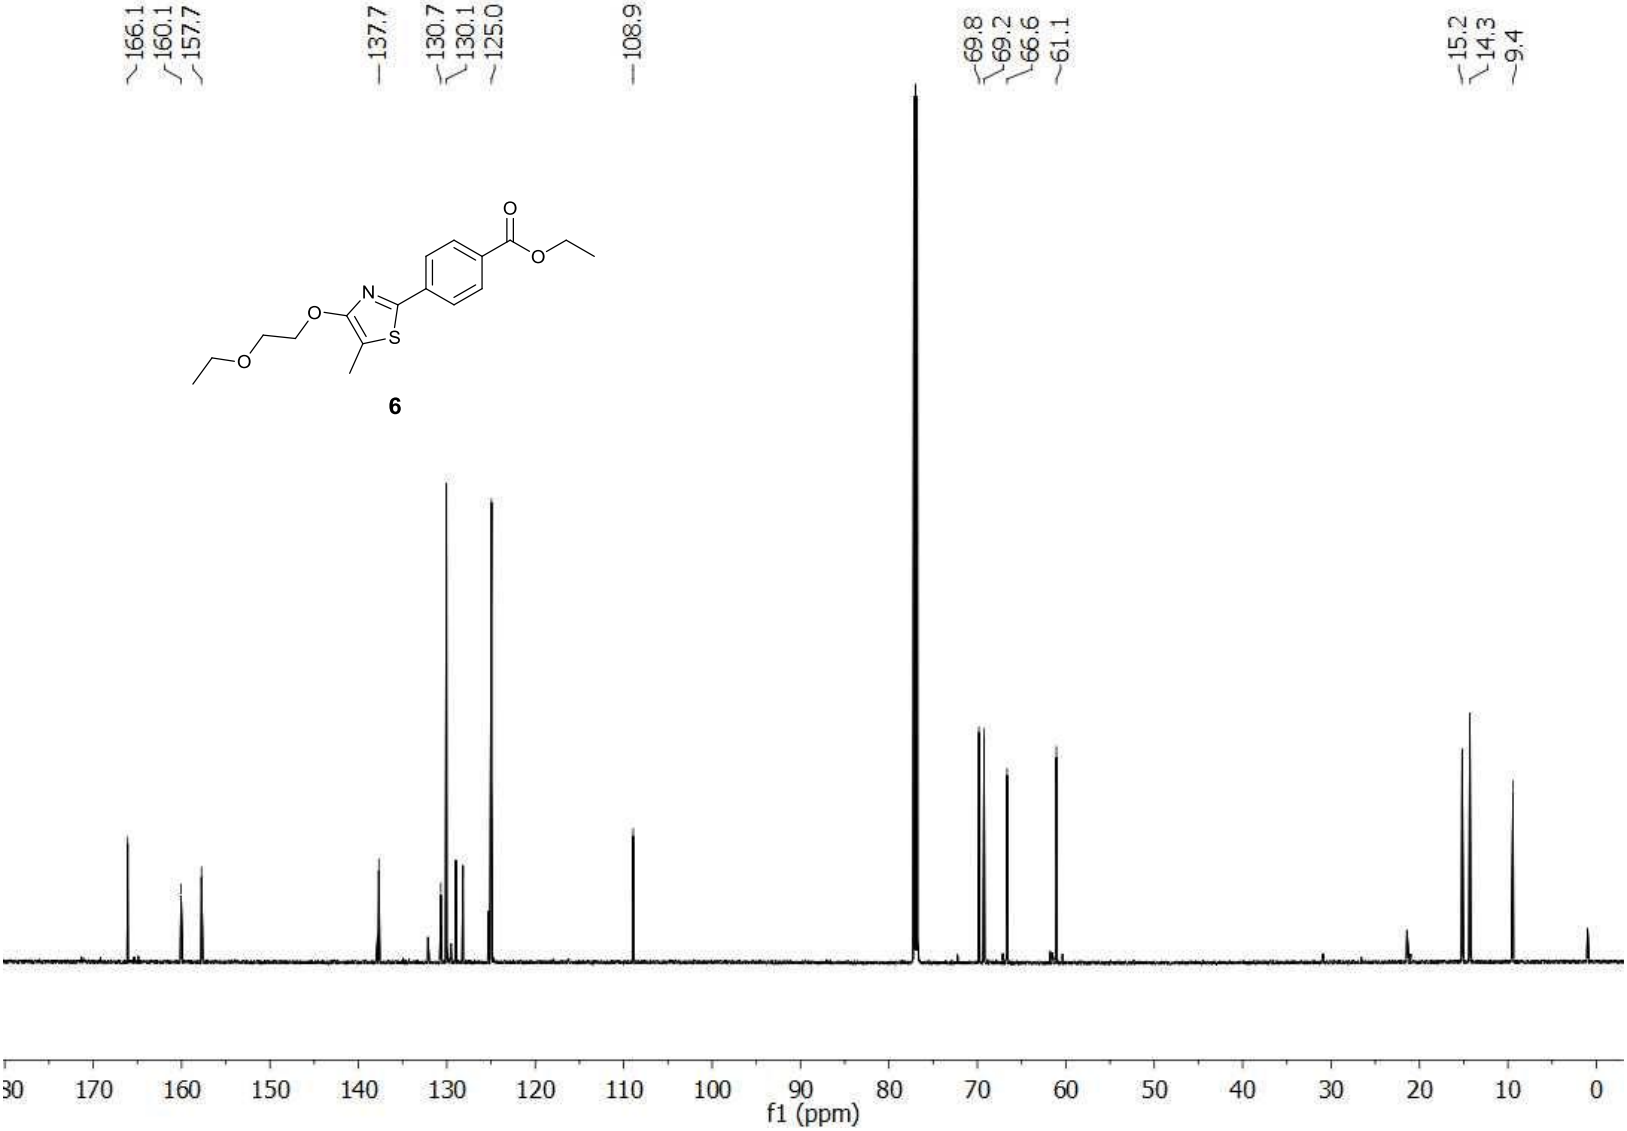

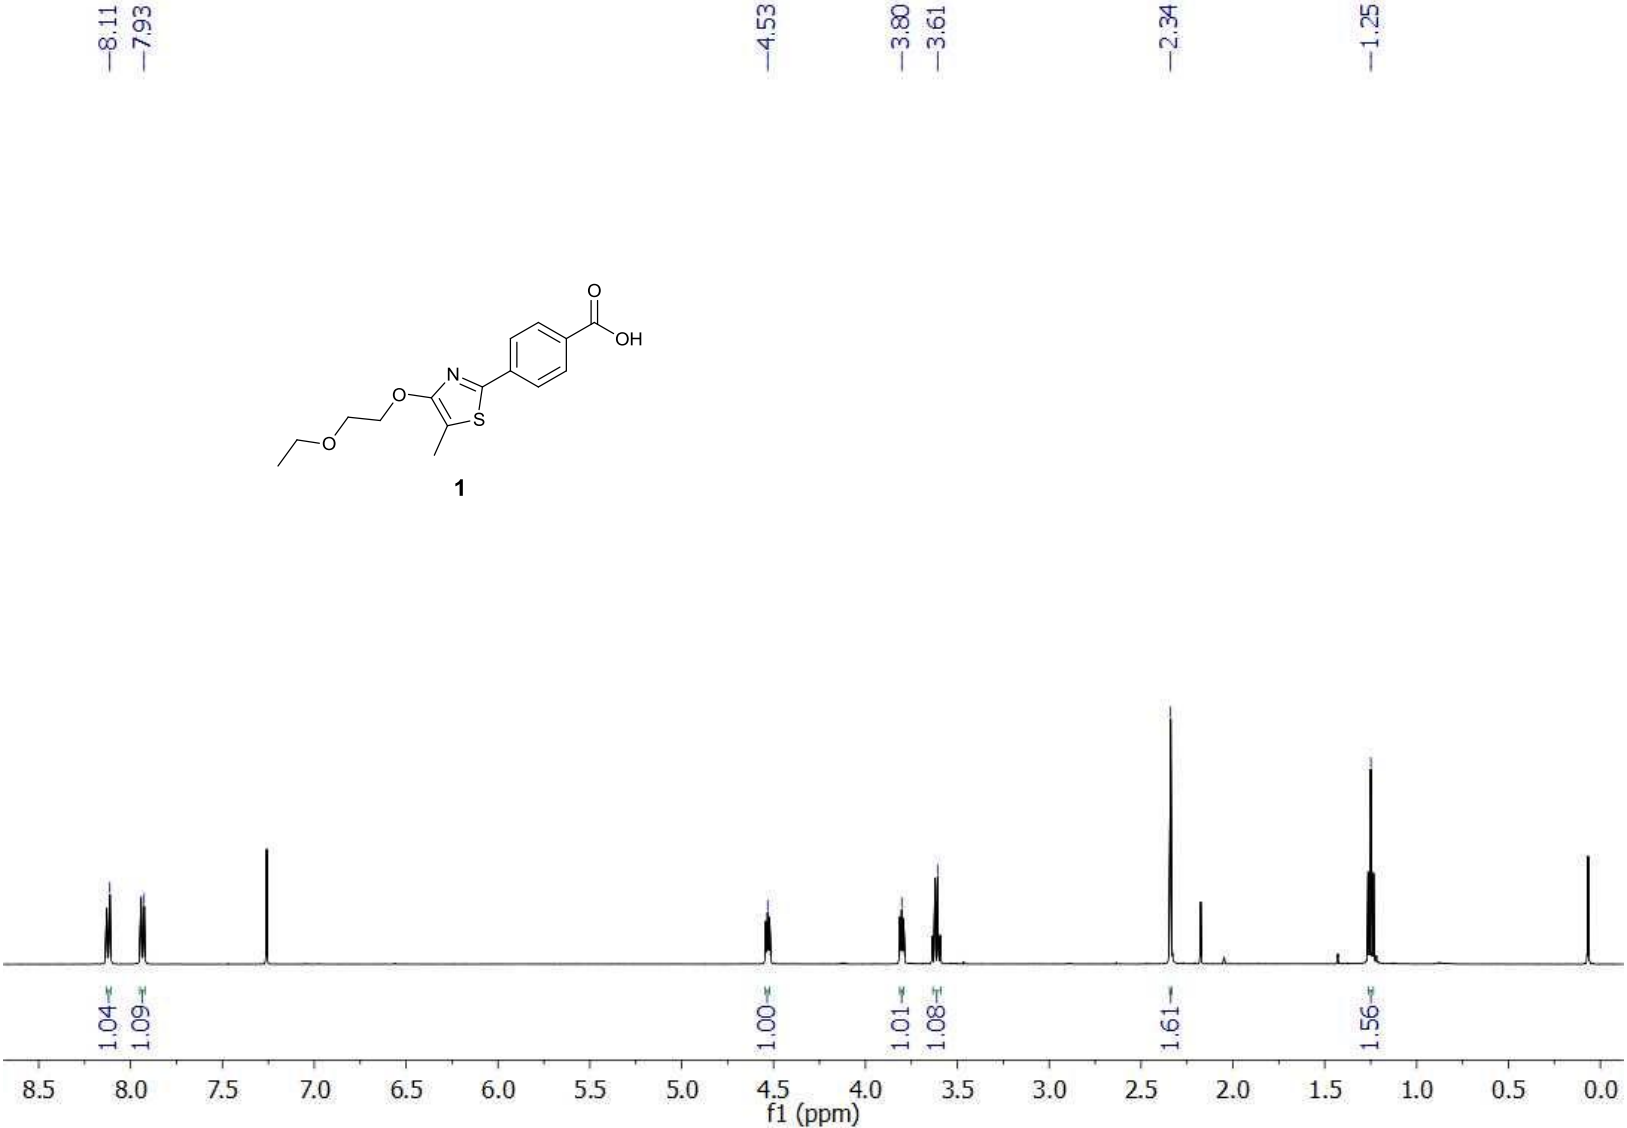

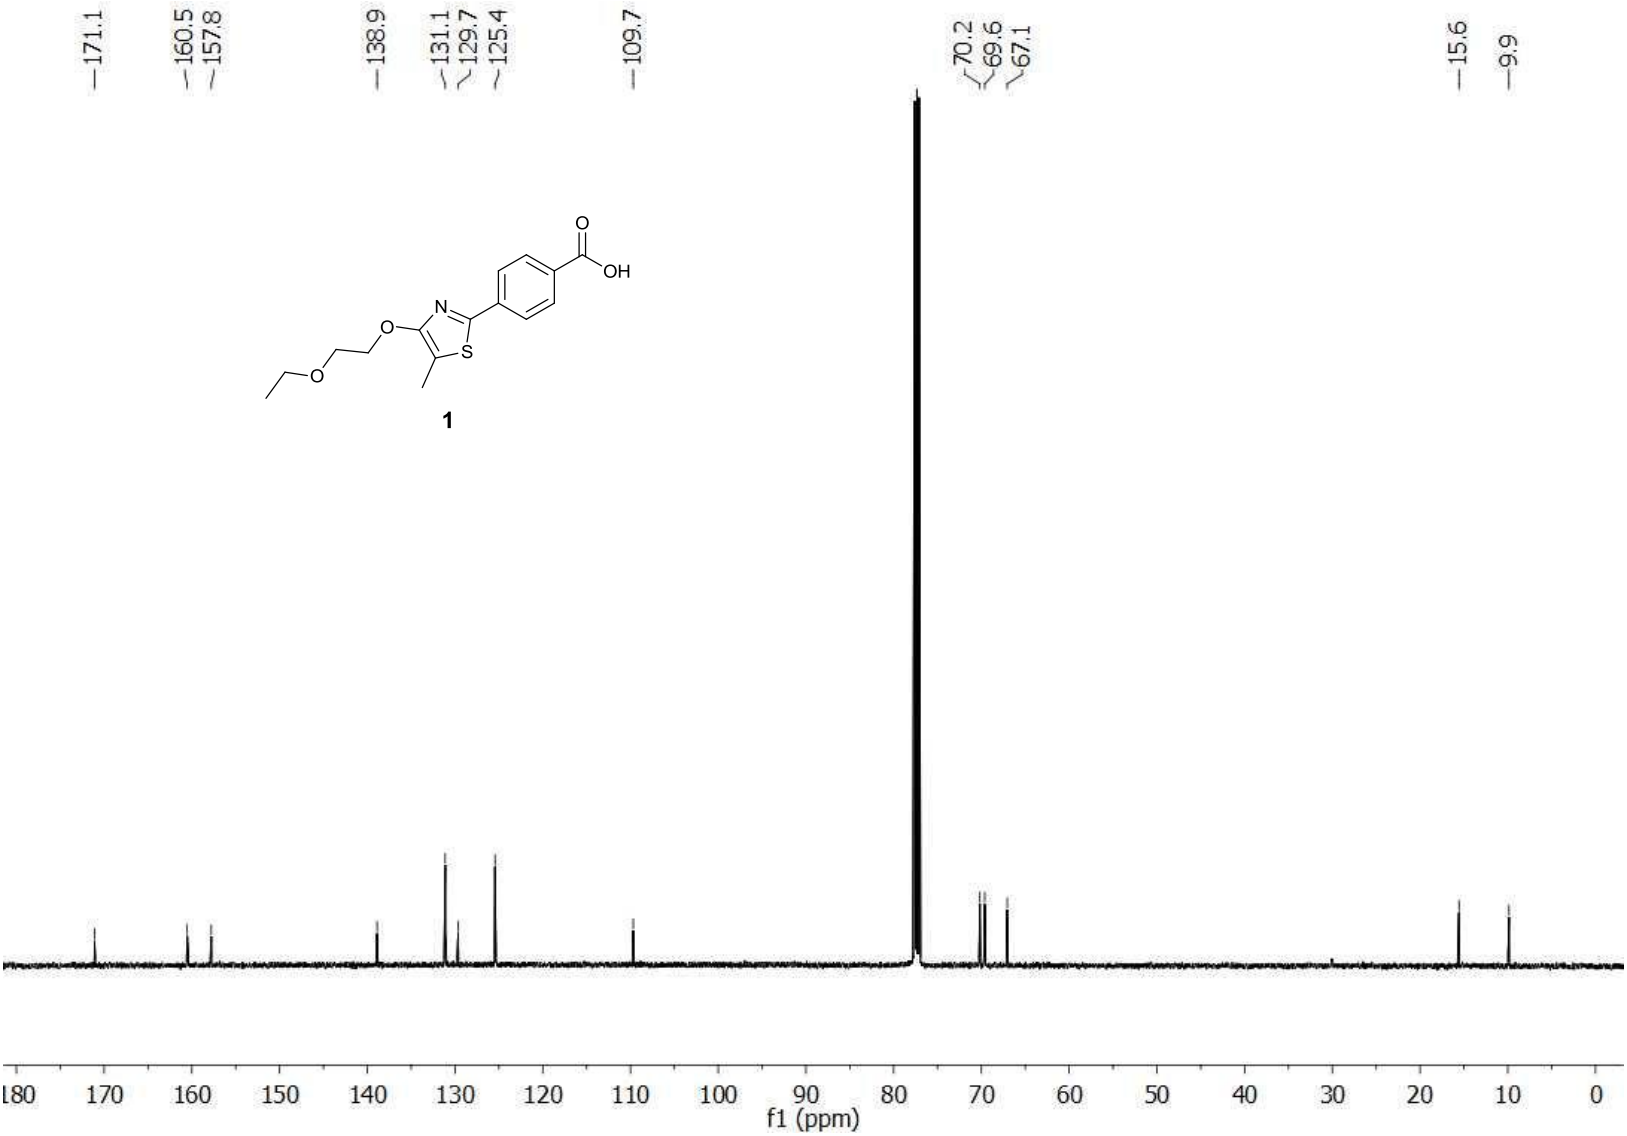

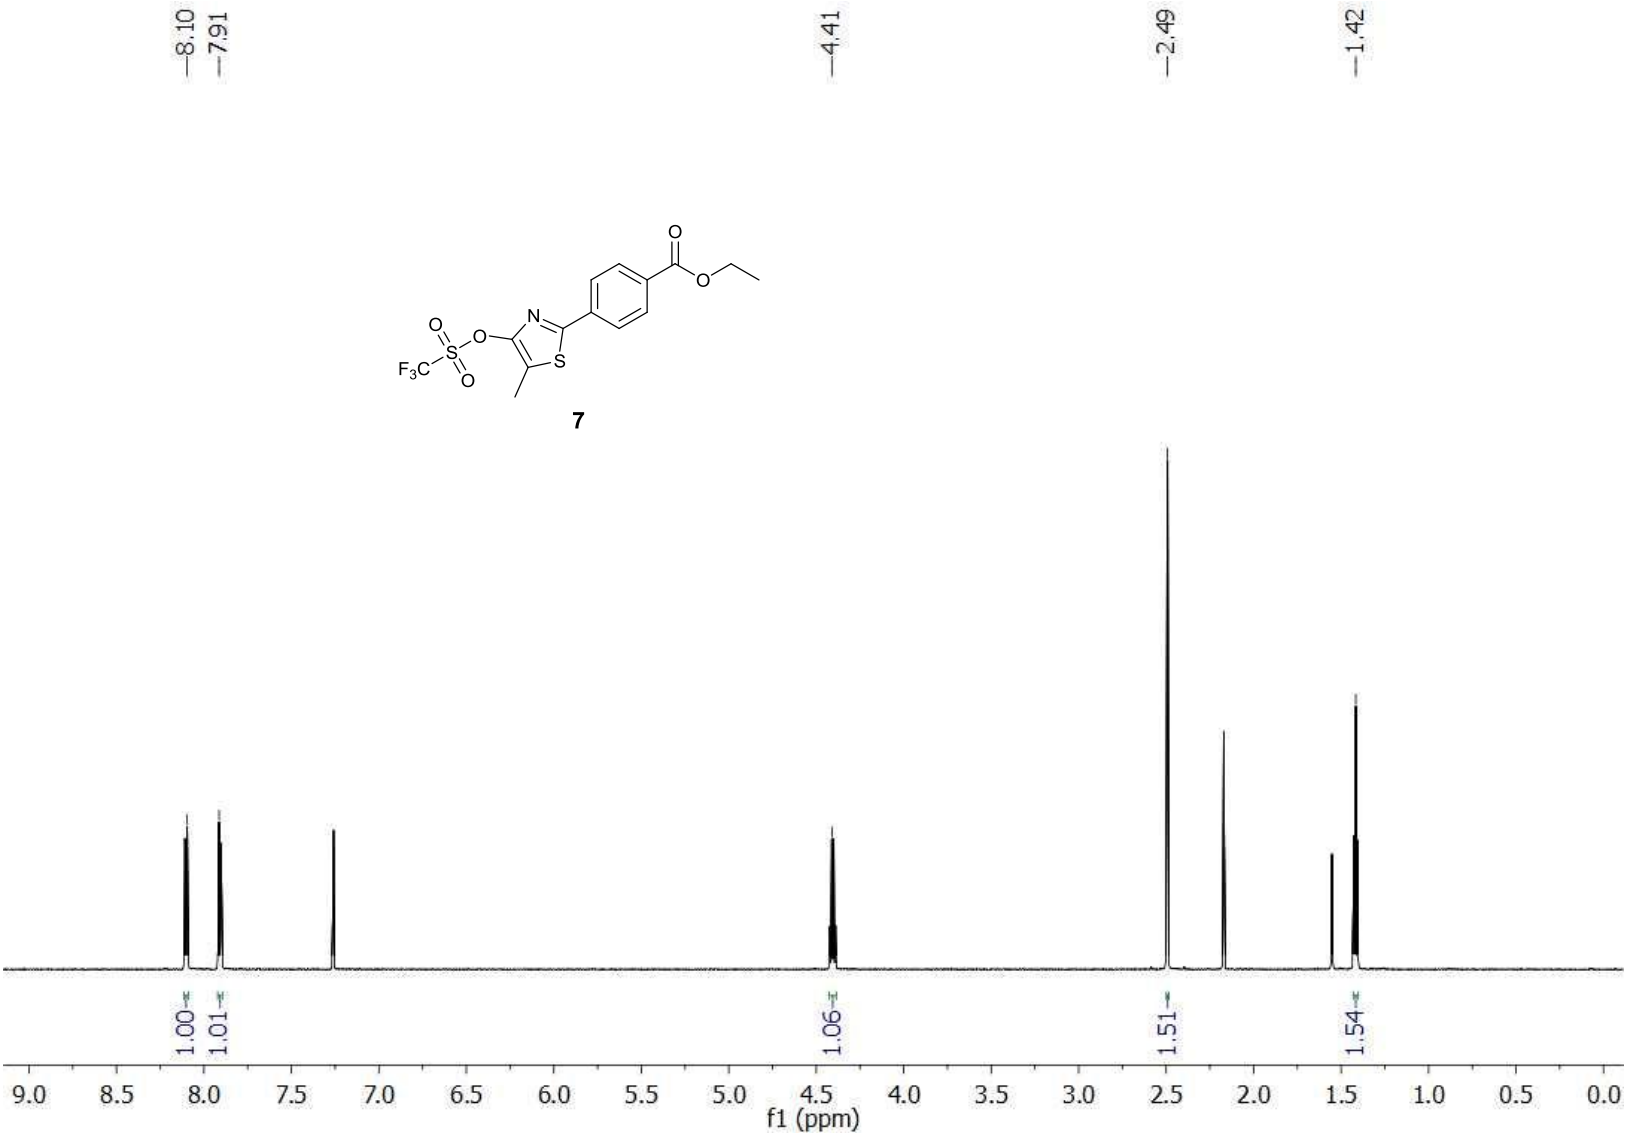

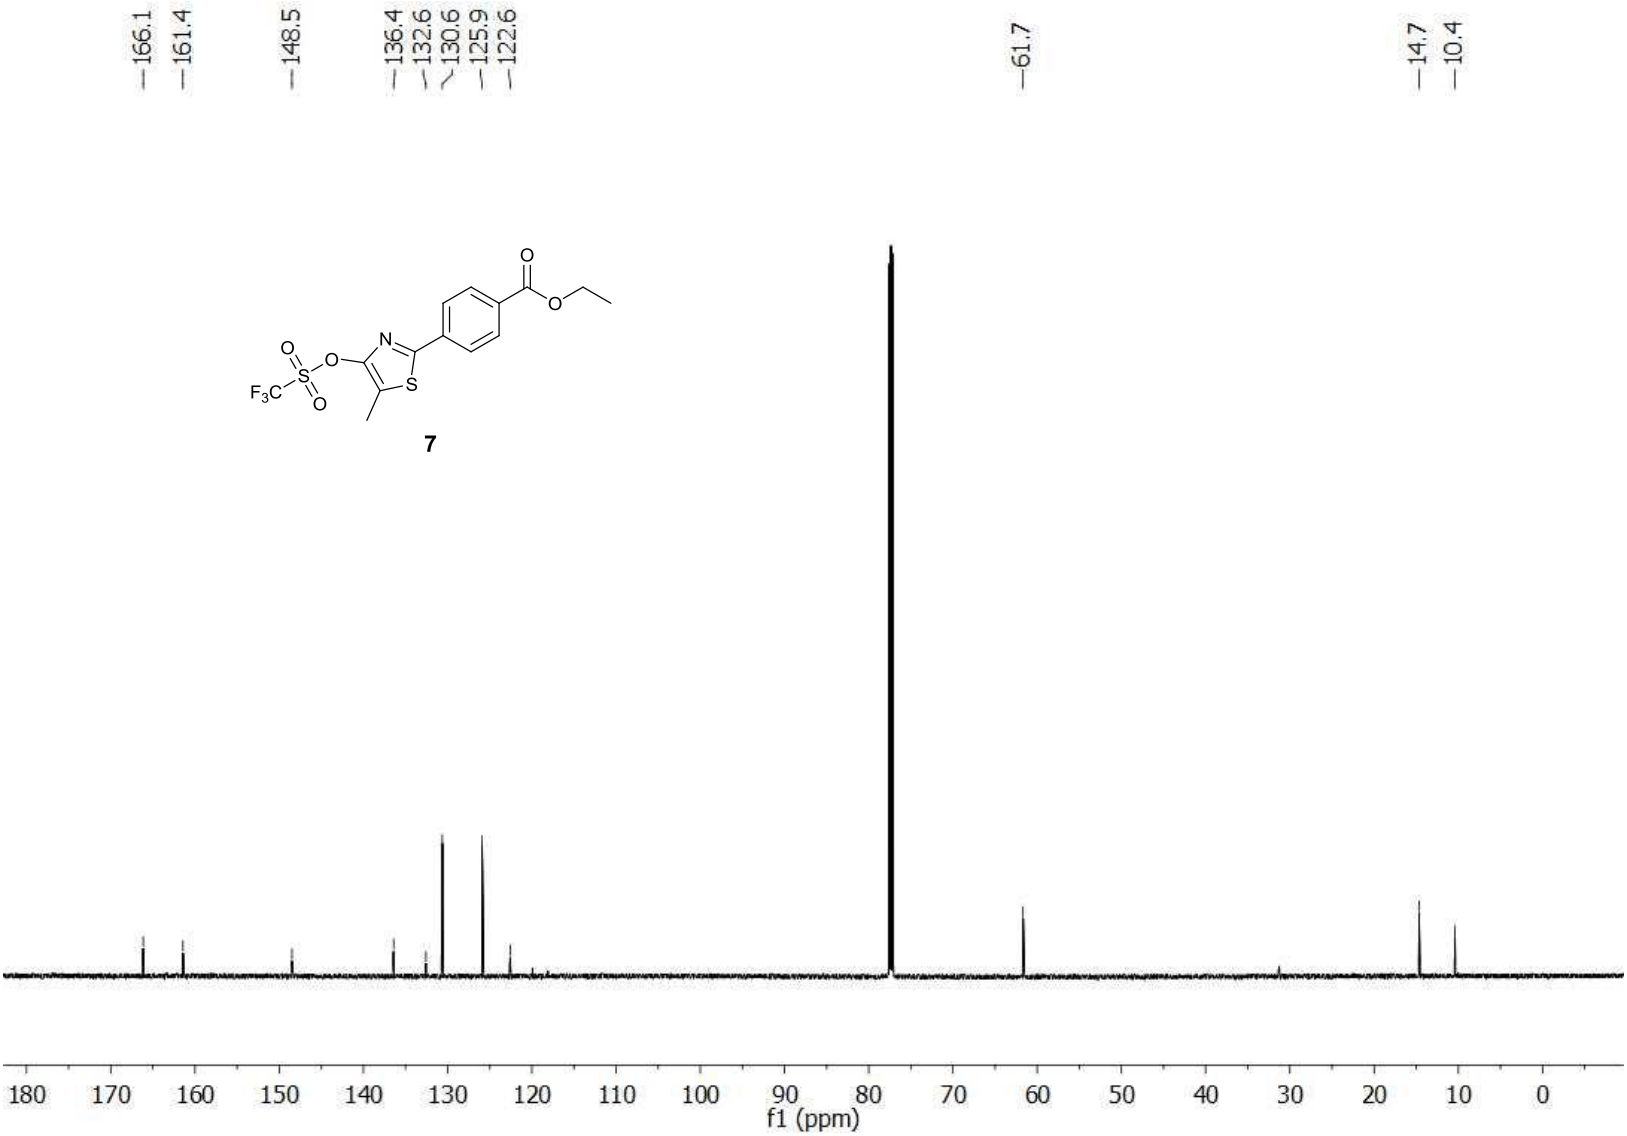

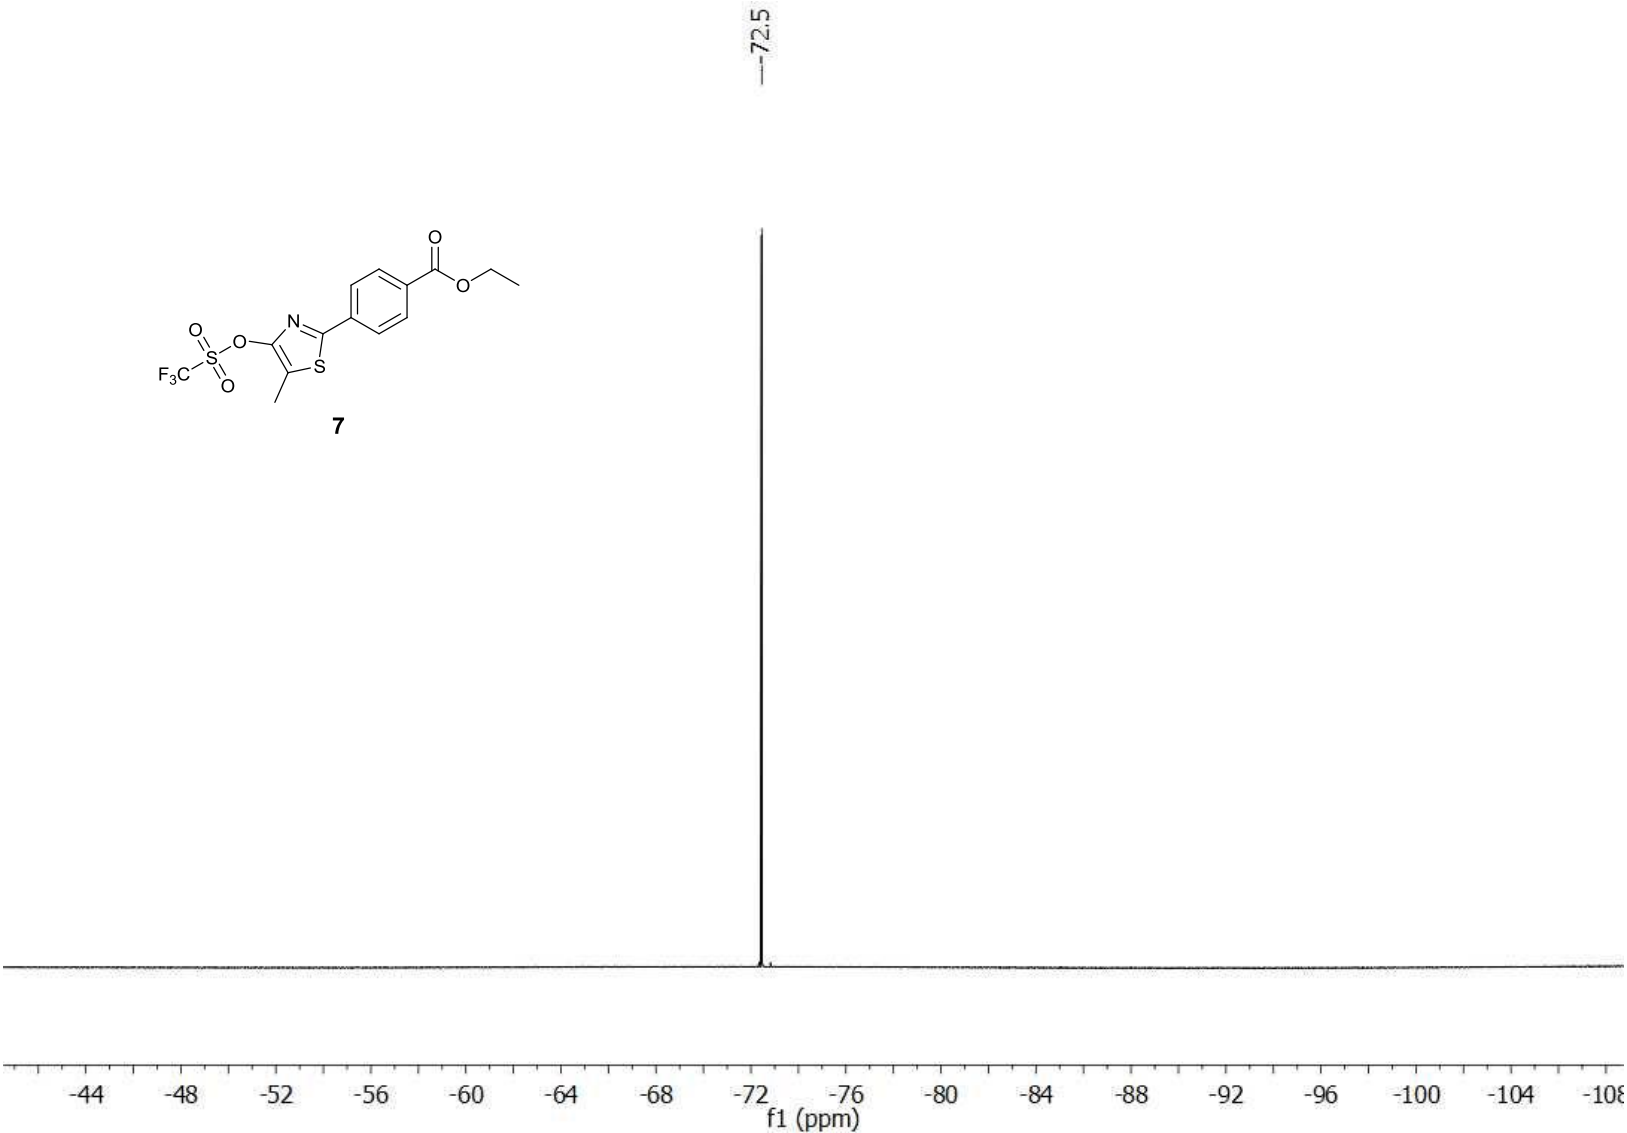

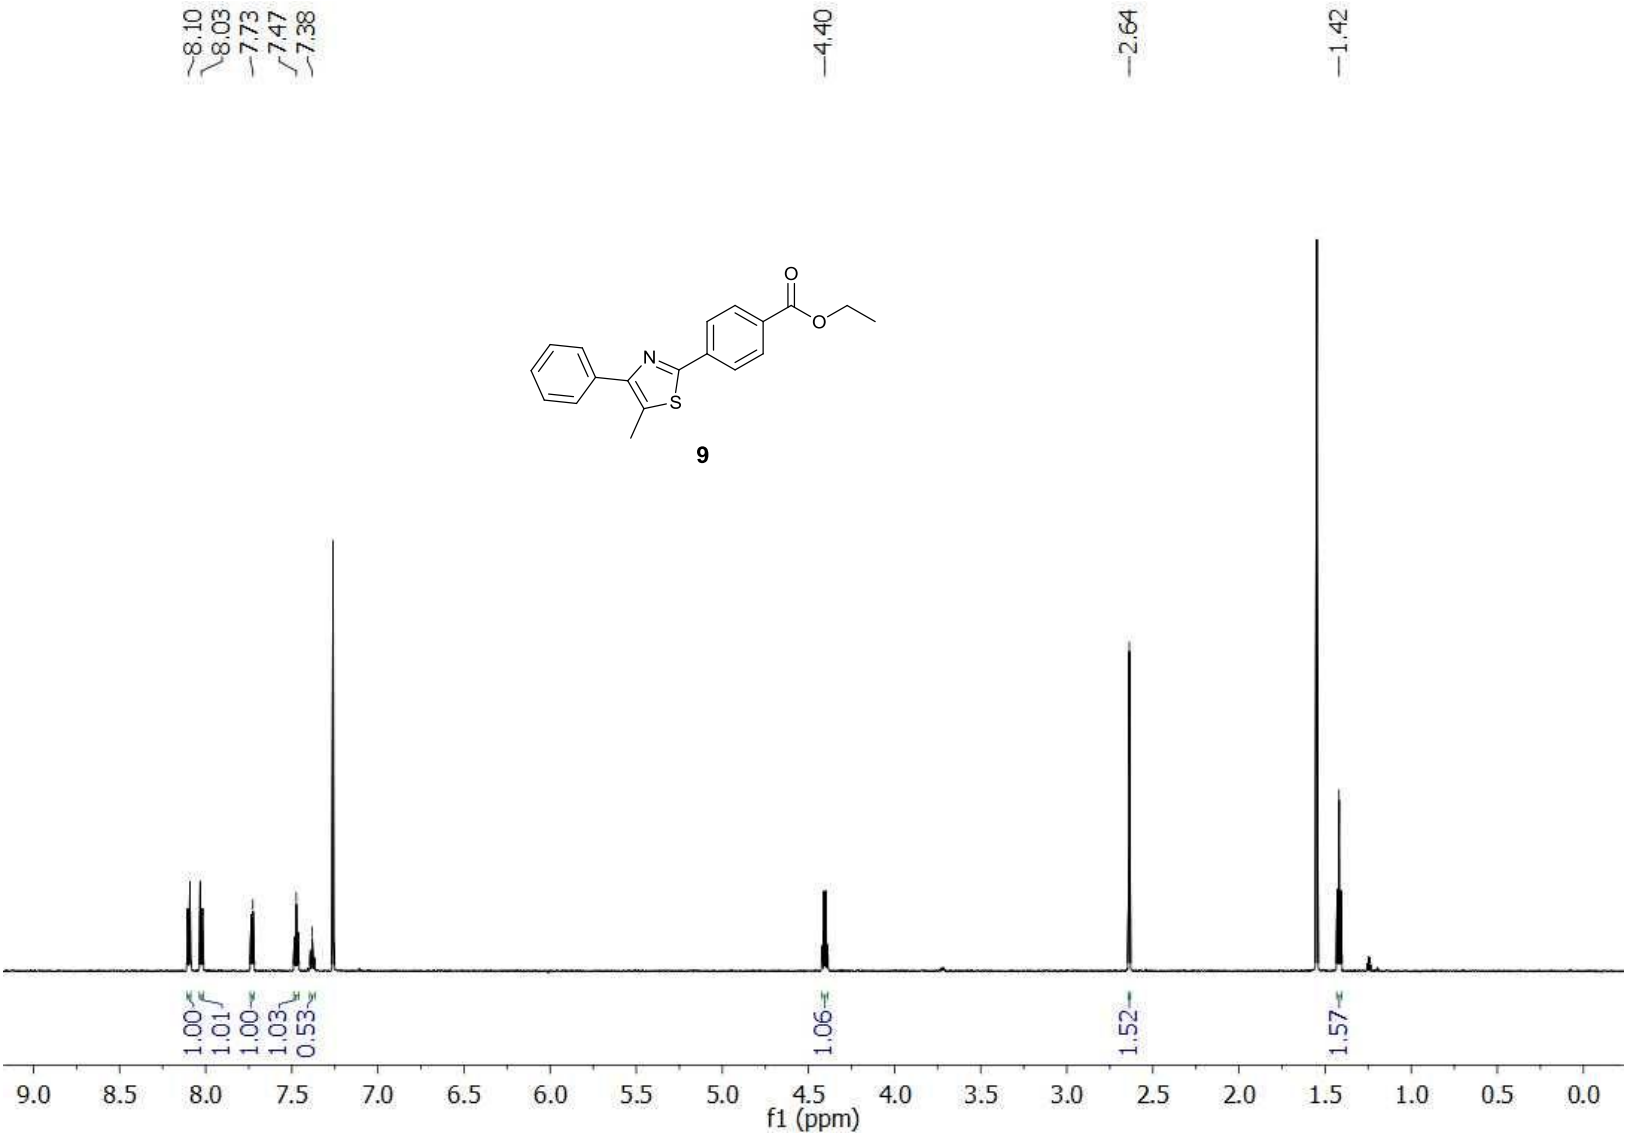

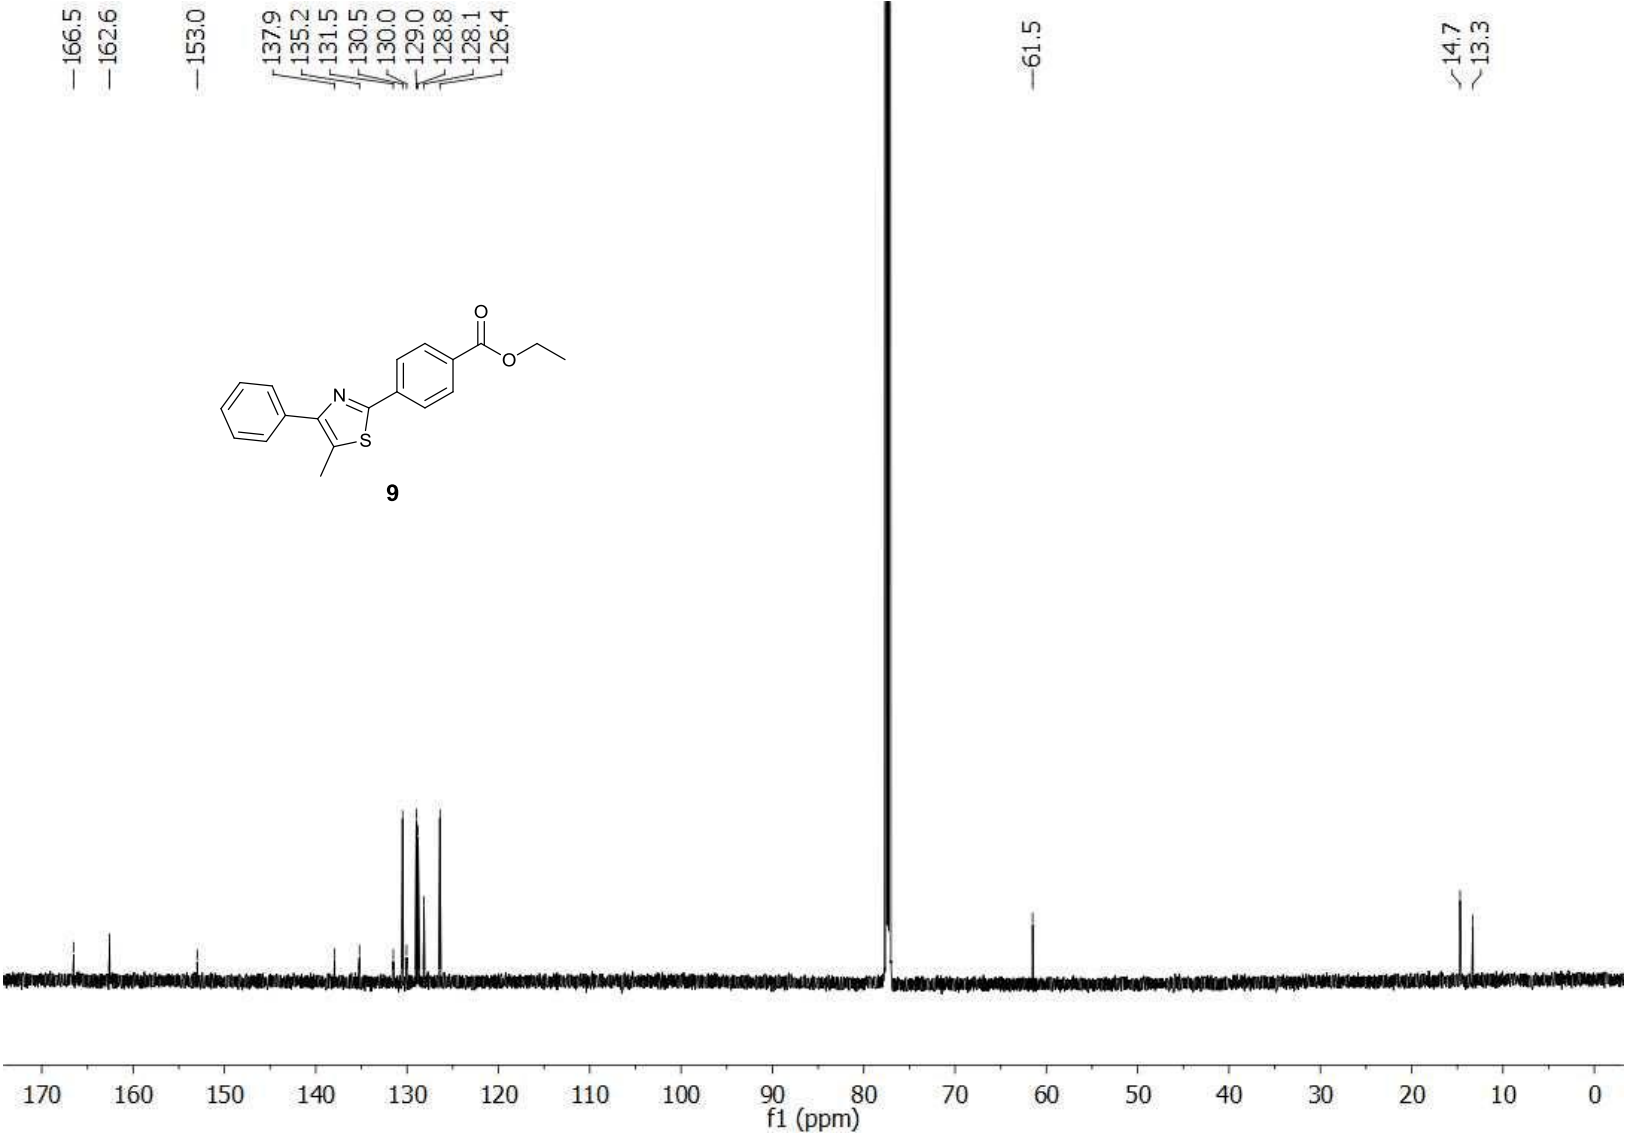

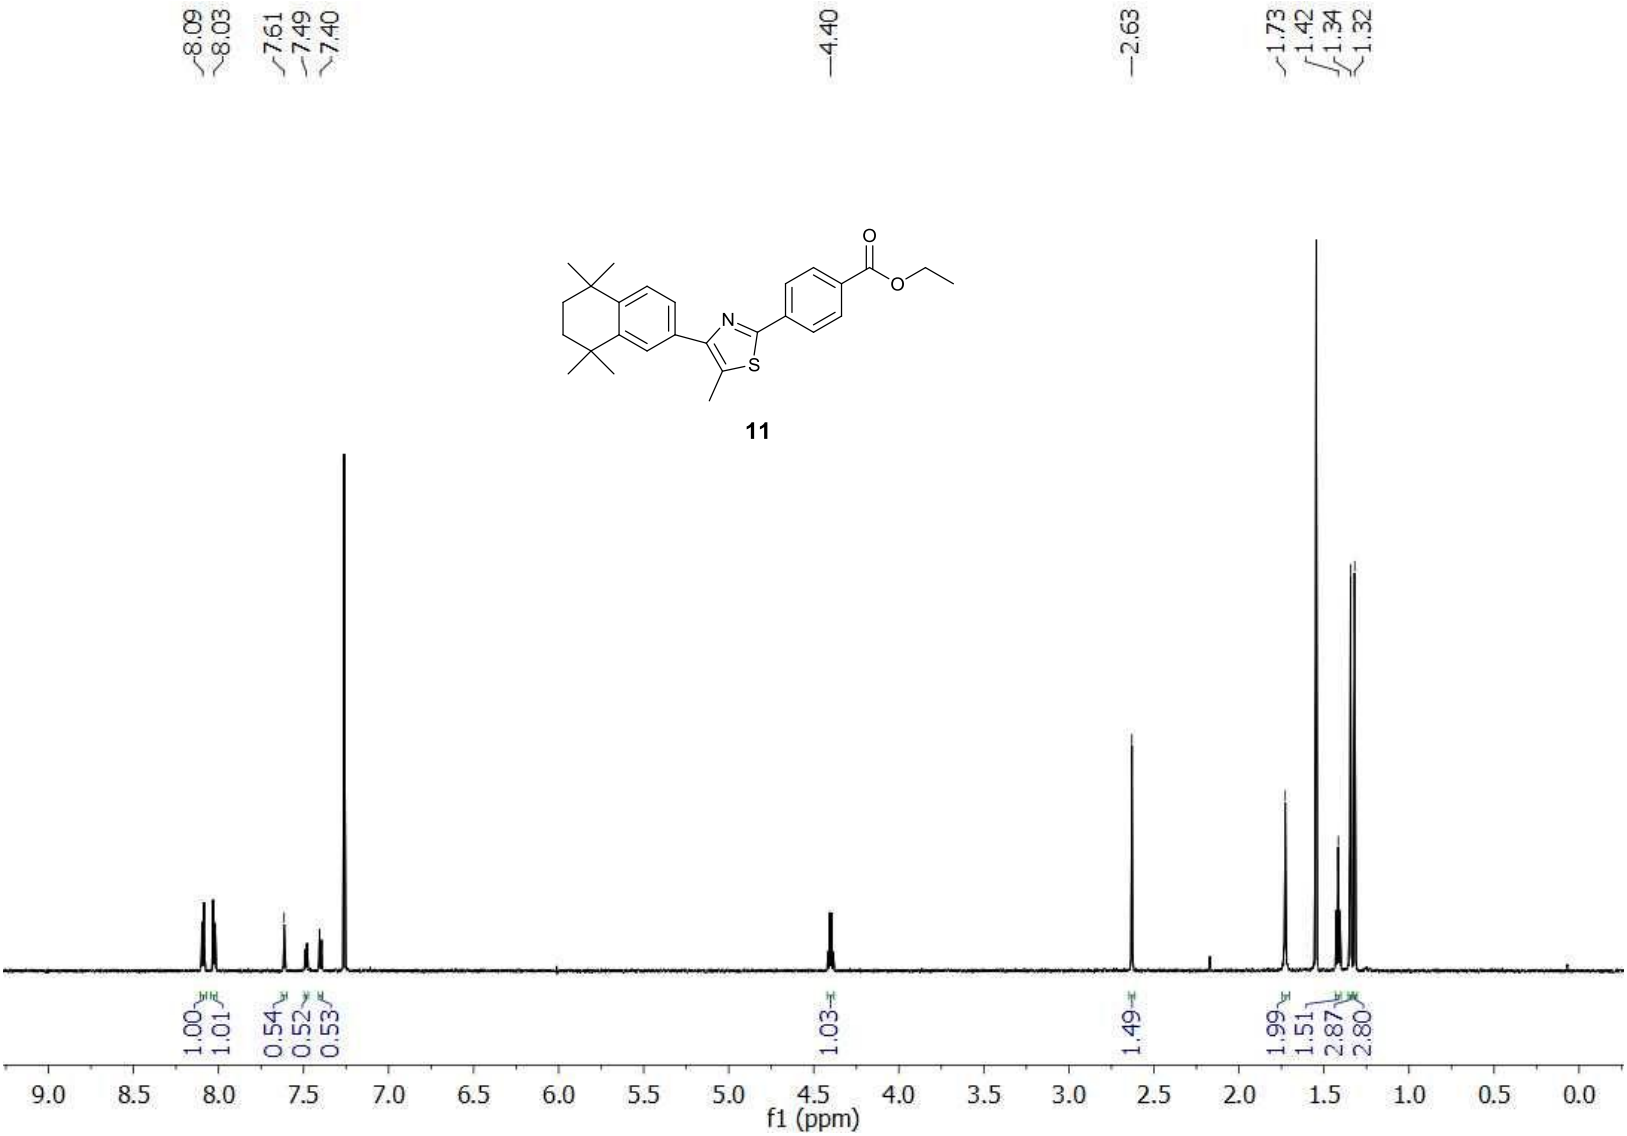

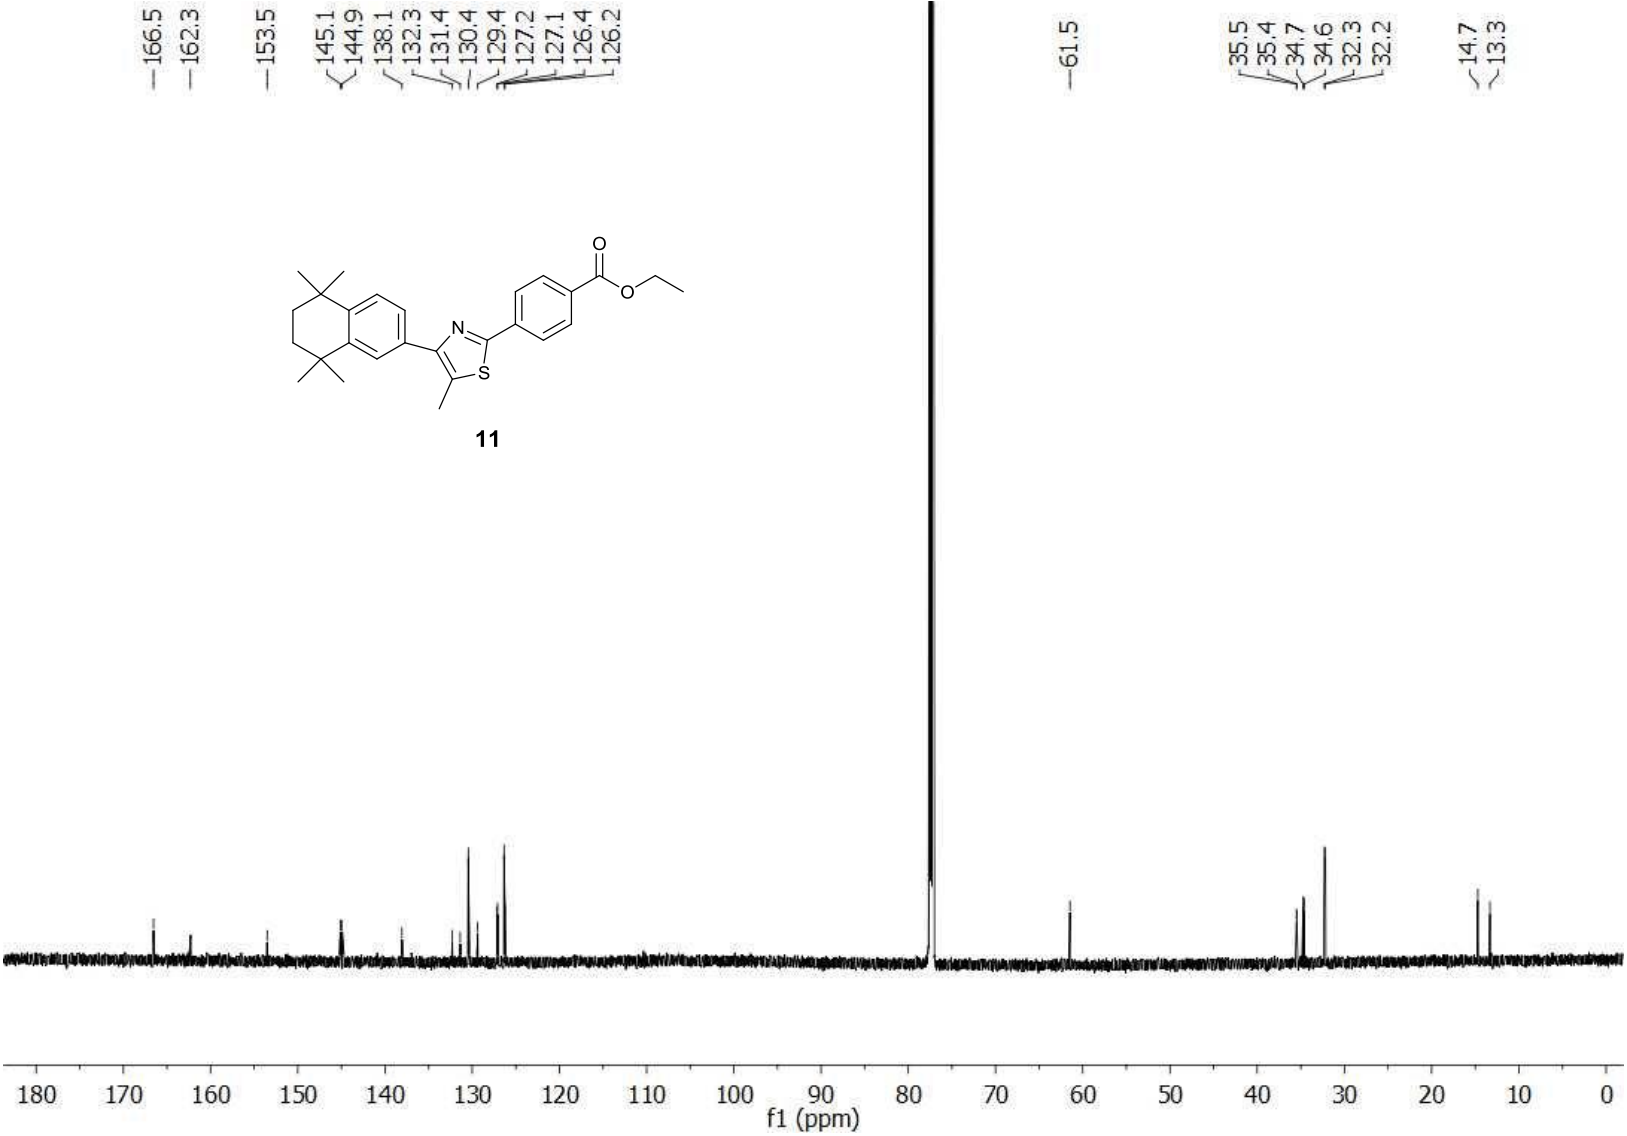

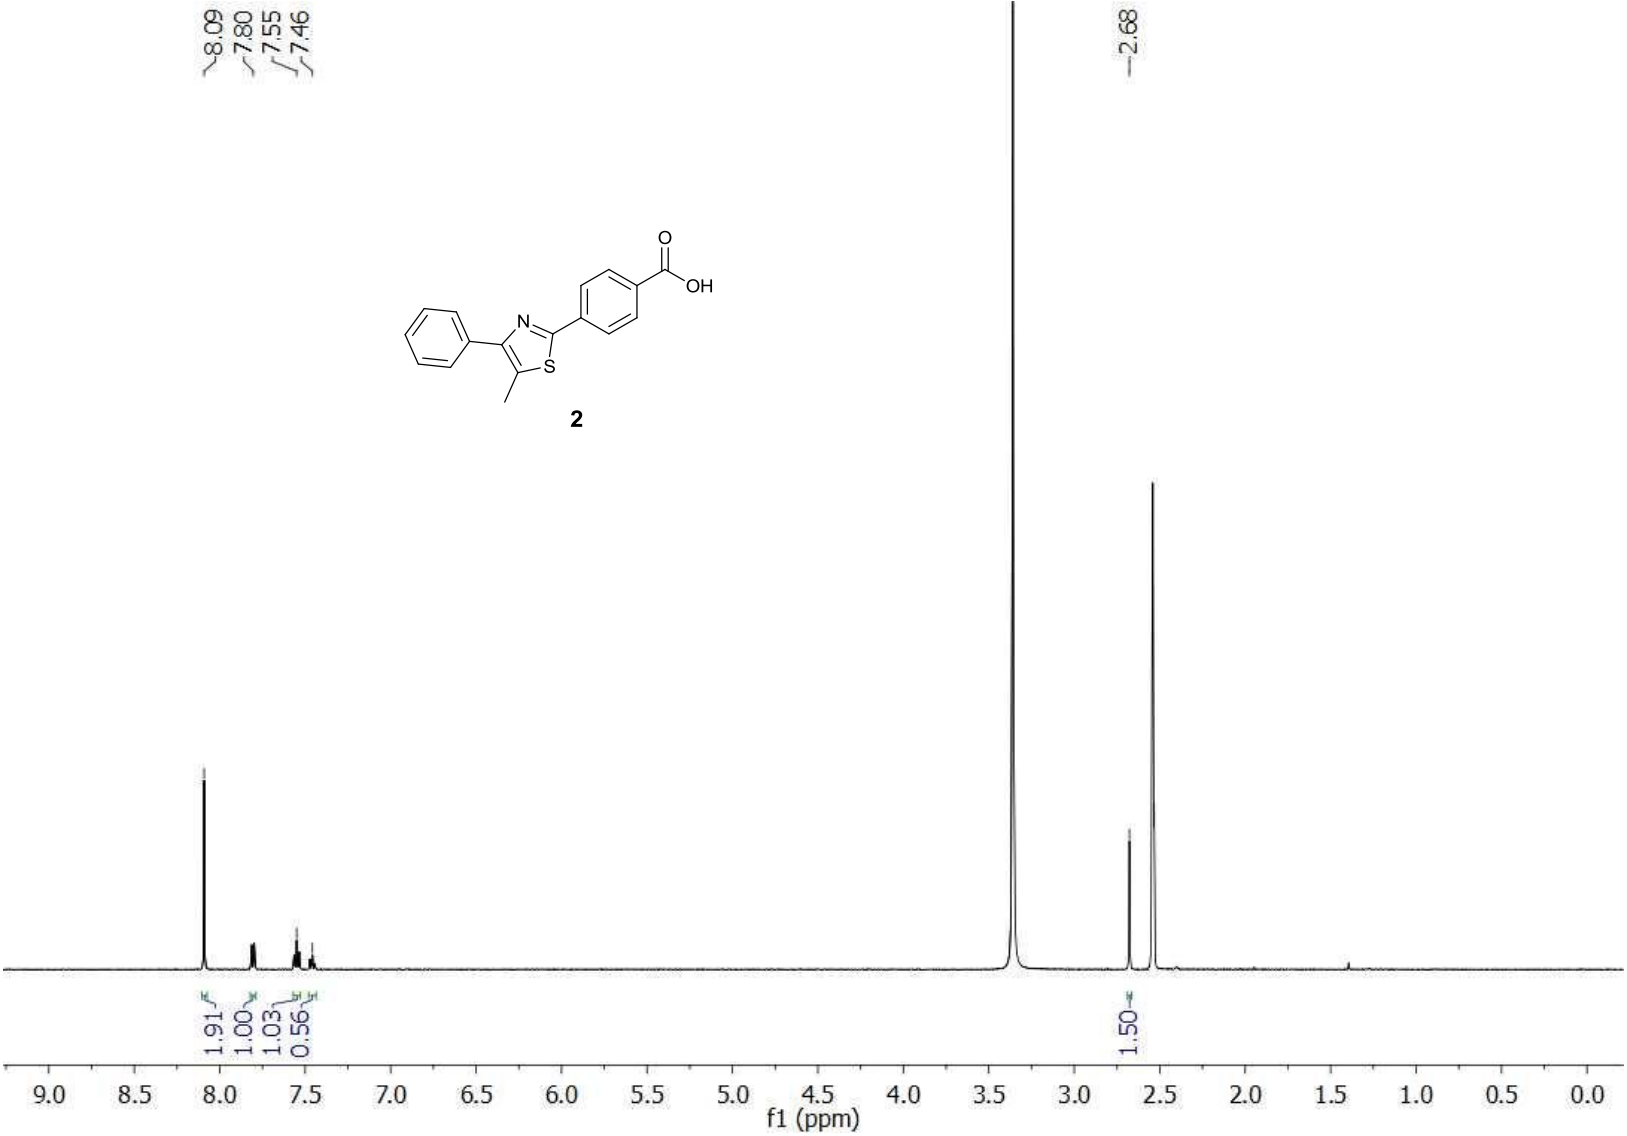

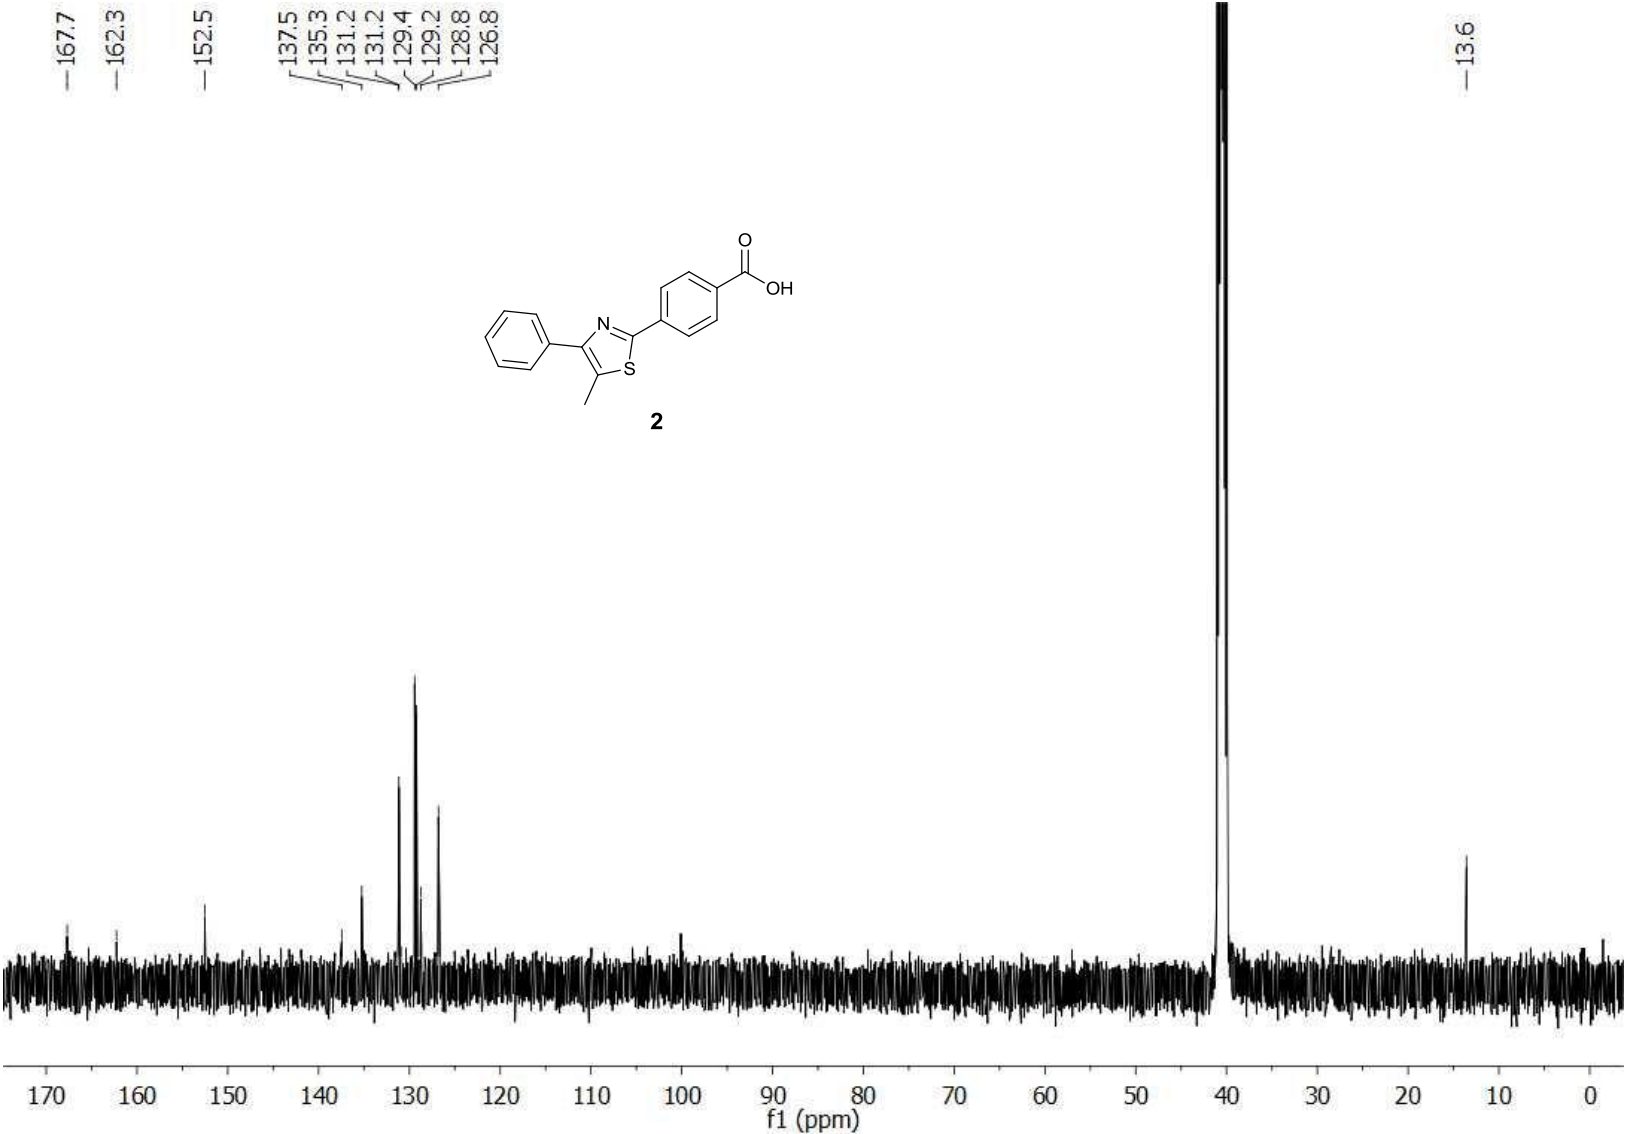

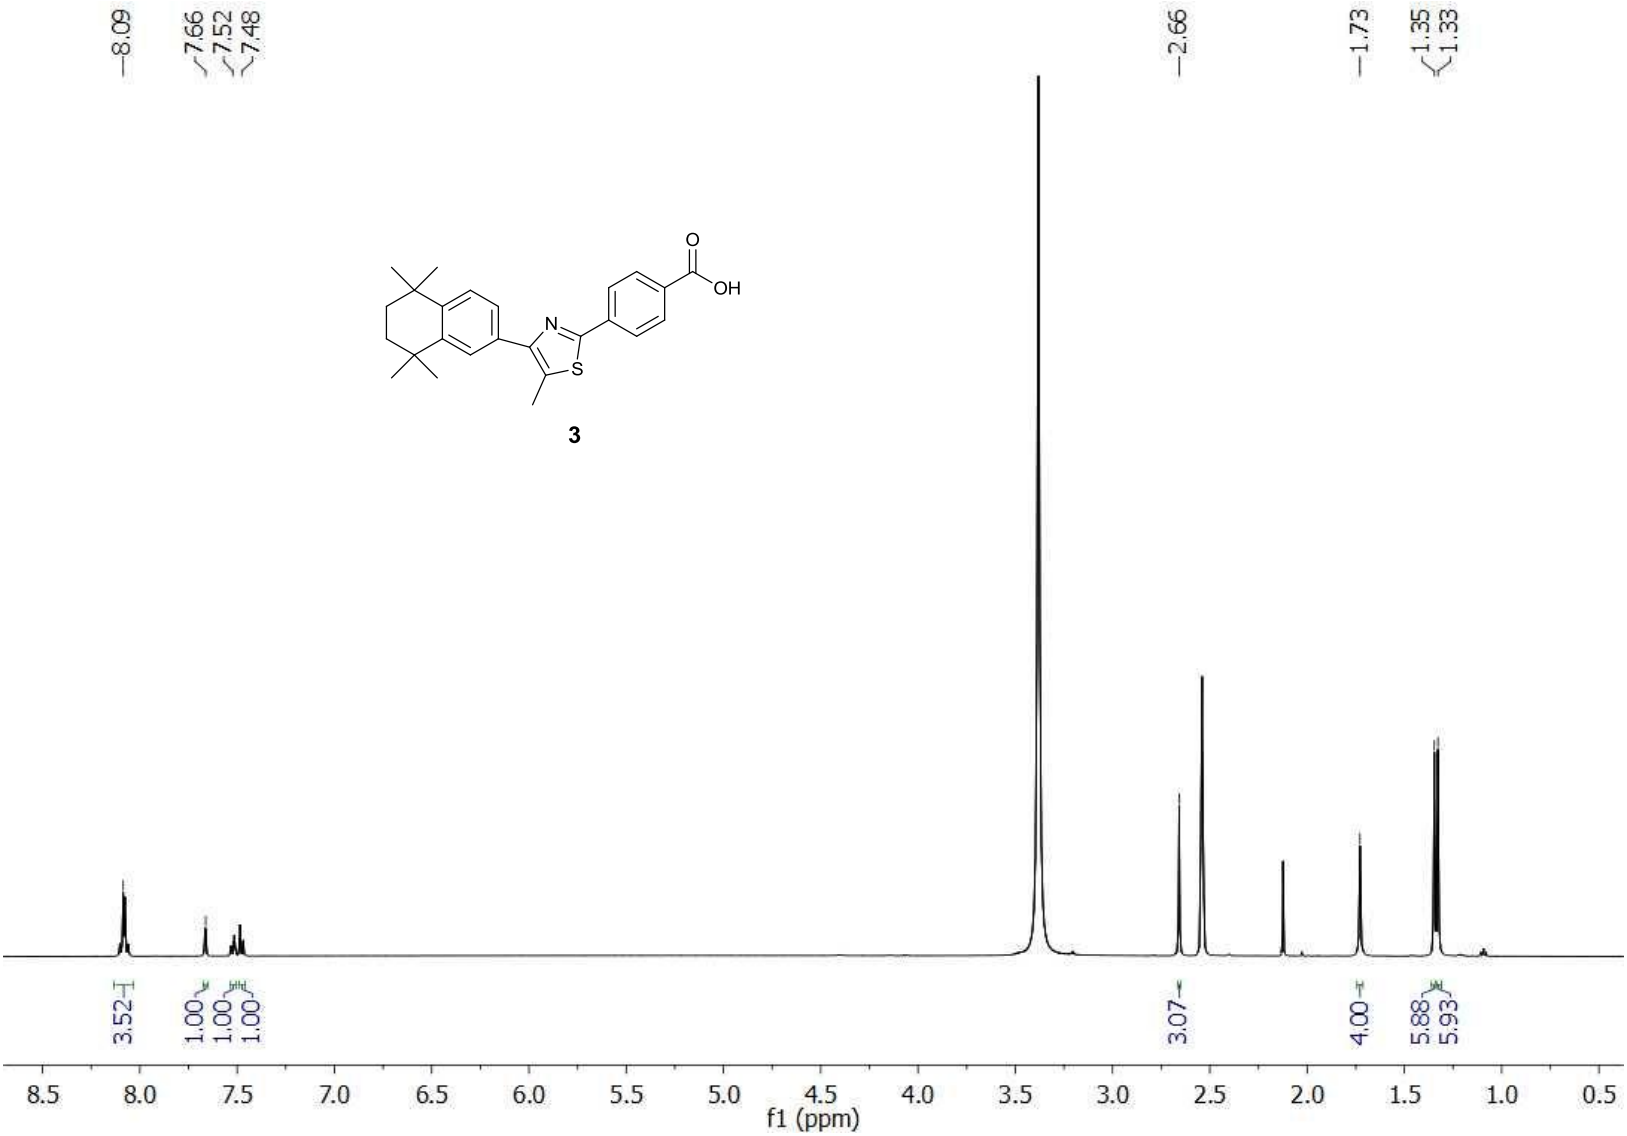

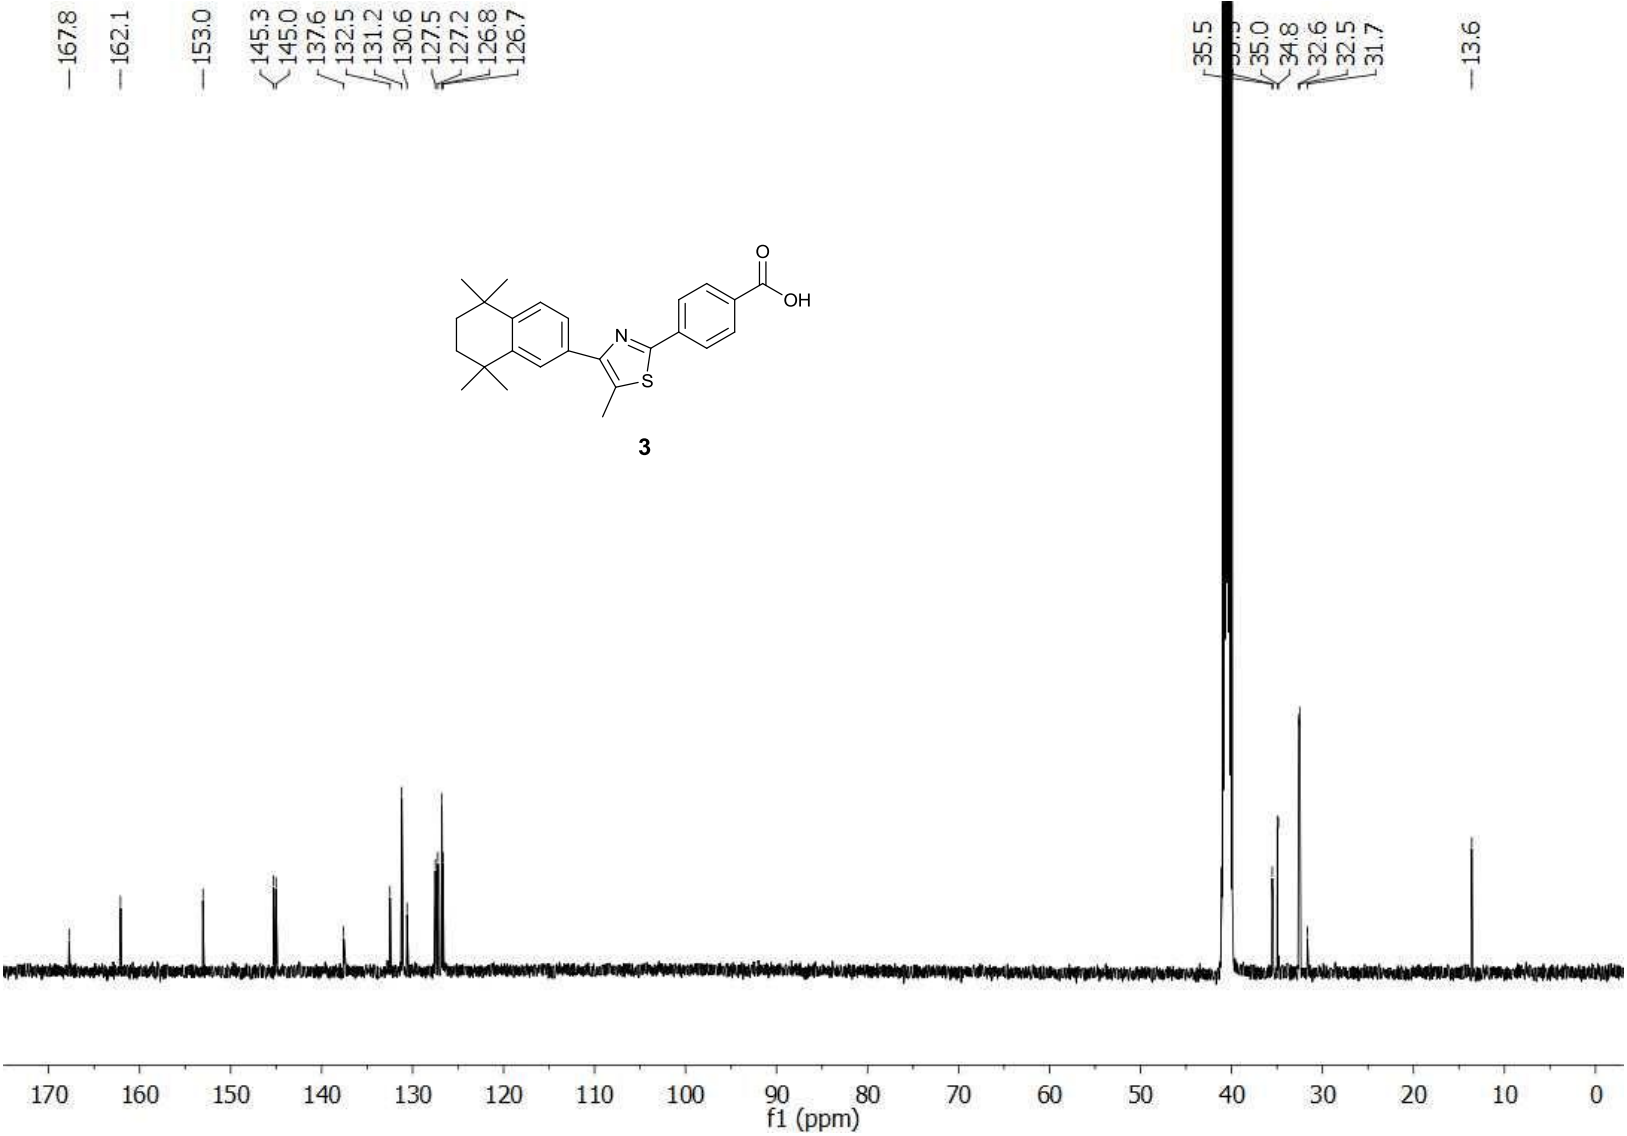

Supplement: c3ob00005b.pdf [file c3ob00005b.pdf]
